# Supplementary material for: B-positive: a randomized controlled trial of a multicomponent positive psychology intervention for euthymic patients with bipolar disorder - study protocol and intervention development
Source: Springer Nature journal article supplement (doi:10.1186/s12888-018-1916-3), 2018-10-17

## Enrolment

## Allocation

## Follow-up

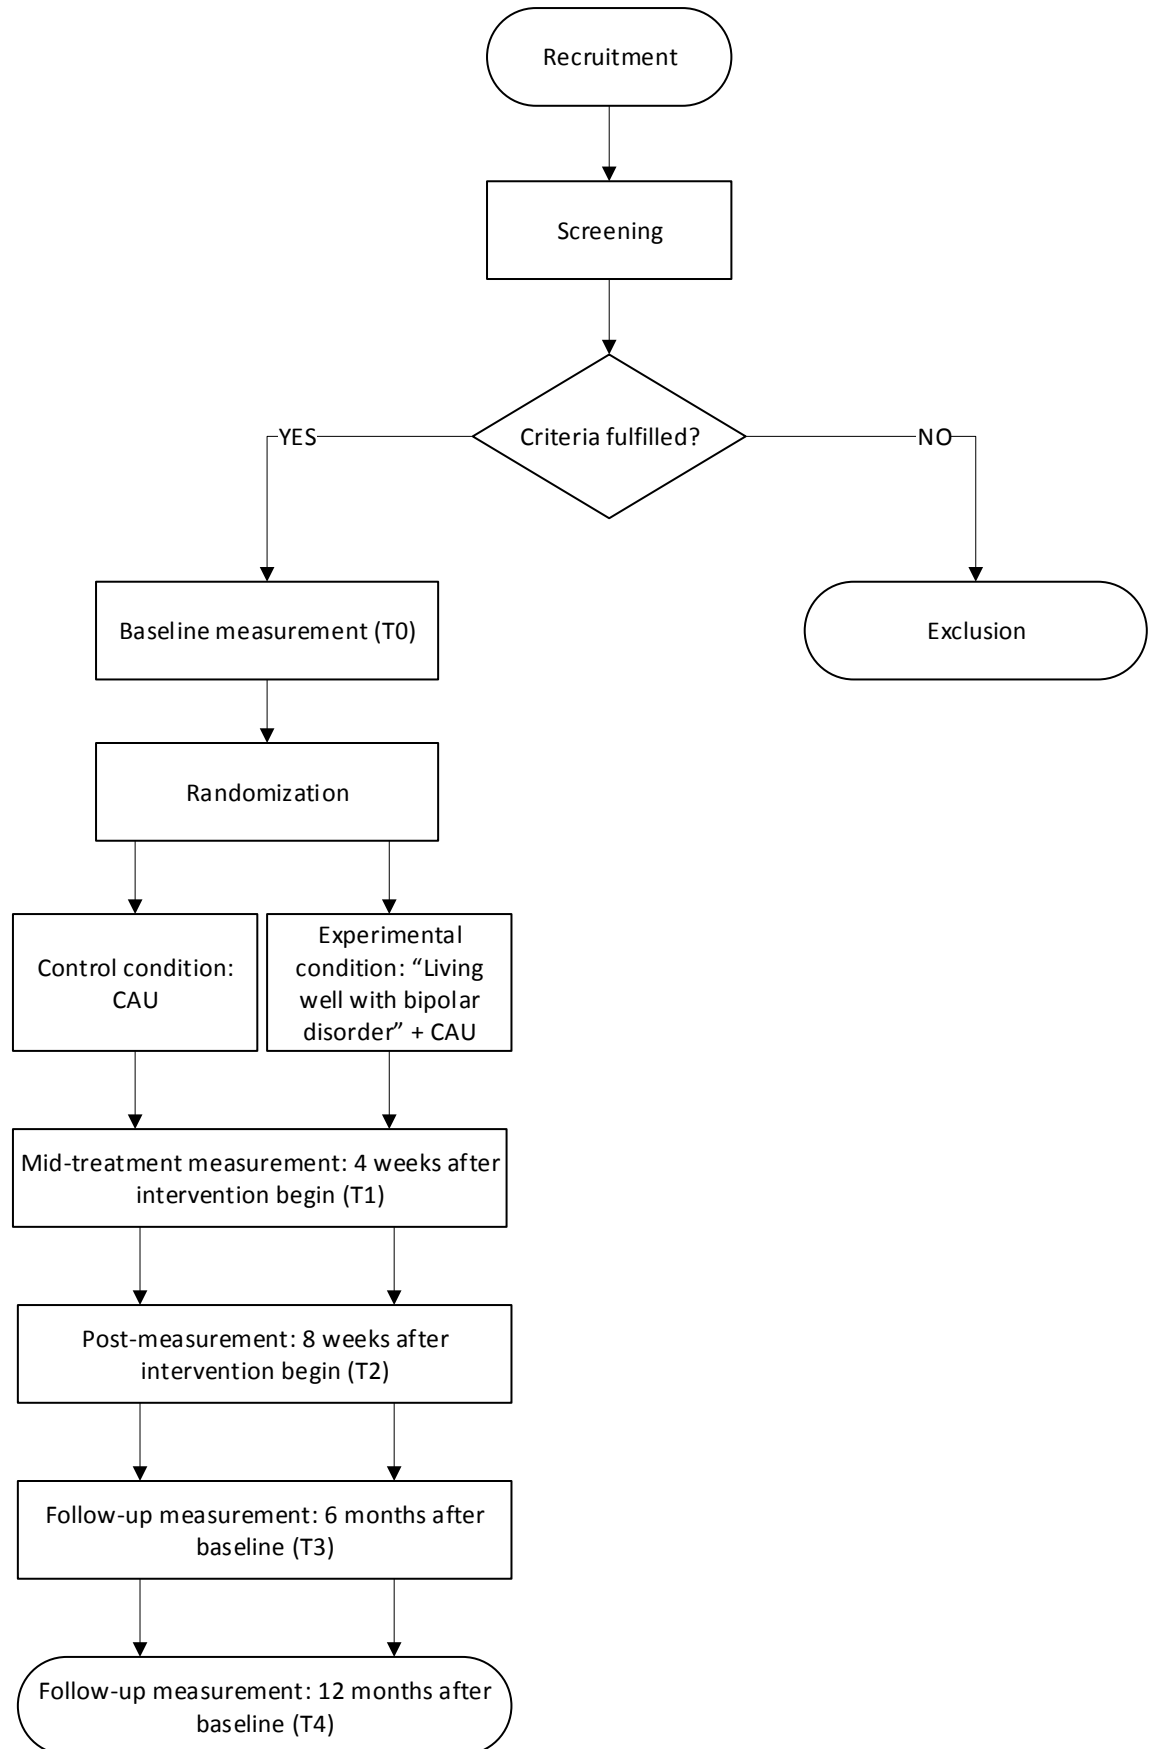

Supplement: MOESM1 [file 16206824]
